# Supplementary material
Source: Springer Nature journal article supplement (https://www.springermedizin.de/resource/supplementary/12885_2012_3389_MOESM3_ESM.pdf/9463306)

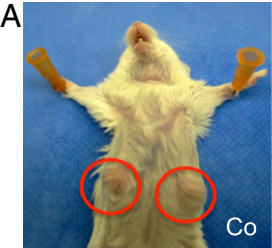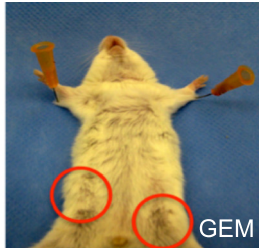

**B**

| Xenograft no. | % change in tumour volume |      | % SP |      |
|---------------|---------------------------|------|------|------|
|               | Co                        | GEM  | Co   | GEM  |
| 174           | +345                      | -72  | 3.4  | 28.2 |
| 178           | +46                       | -75  | 2.7  | 4.3  |
| 207           | +346                      | +244 | 10.2 | 10.1 |
| 223           | +96                       | +63  | 0.9  | 1.2  |
| 229           | +140                      | +99  | 4.3  | 6.6  |
| 235           | +404                      | -72  | 2.1  | 2.5  |
| 241           | +230                      | -54  | 0.9  | 7.0  |

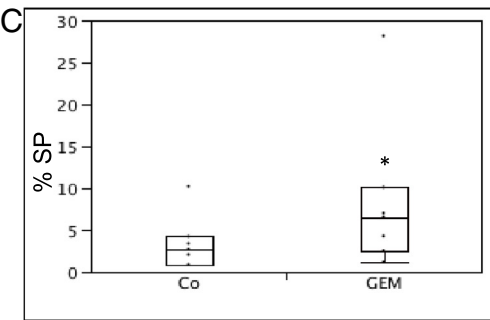

Supplement: MOESM3 [file 9463306]
